# Supplementary material for: Cross-Sectional Study on the Association between Dietary Non-Enzymatic Antioxidant Capacity and Serum Liver Enzymes: The Furukawa Nutrition and Health Study
Source: MDPI journal article supplement (doi:10.3390/nu12072051), 2020-07-10
Supplement: s1 [file s1]

### **Supplemental Figure Legend.**

**Supplemental Figure S1.** The main contribution of food items according to quartiles (Q) of dietary non-enzymatic antioxidant capacity estimated by ferric reducing-antioxidant power (FRAP) and oxygen radical absorbance capacity (ORAC).

Based on the overall NEAC quartiles, beverages, particularly green tea, made the greatest contribution to the total NEAC intake in each quartile, with the exception of the first quartile.

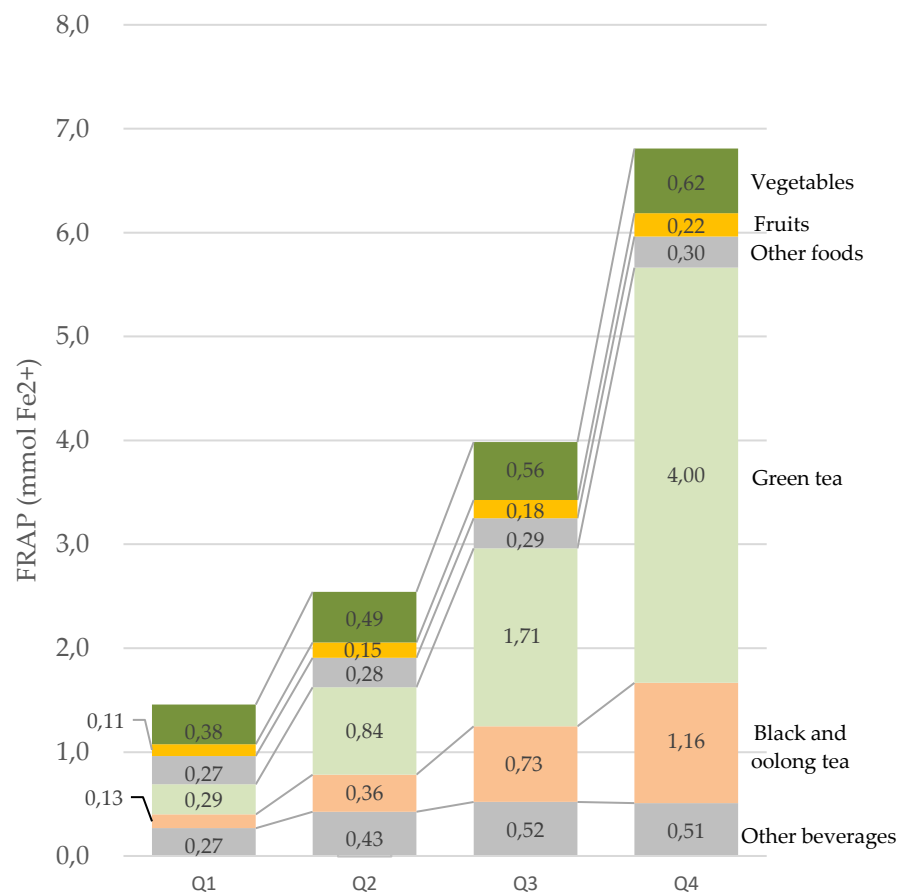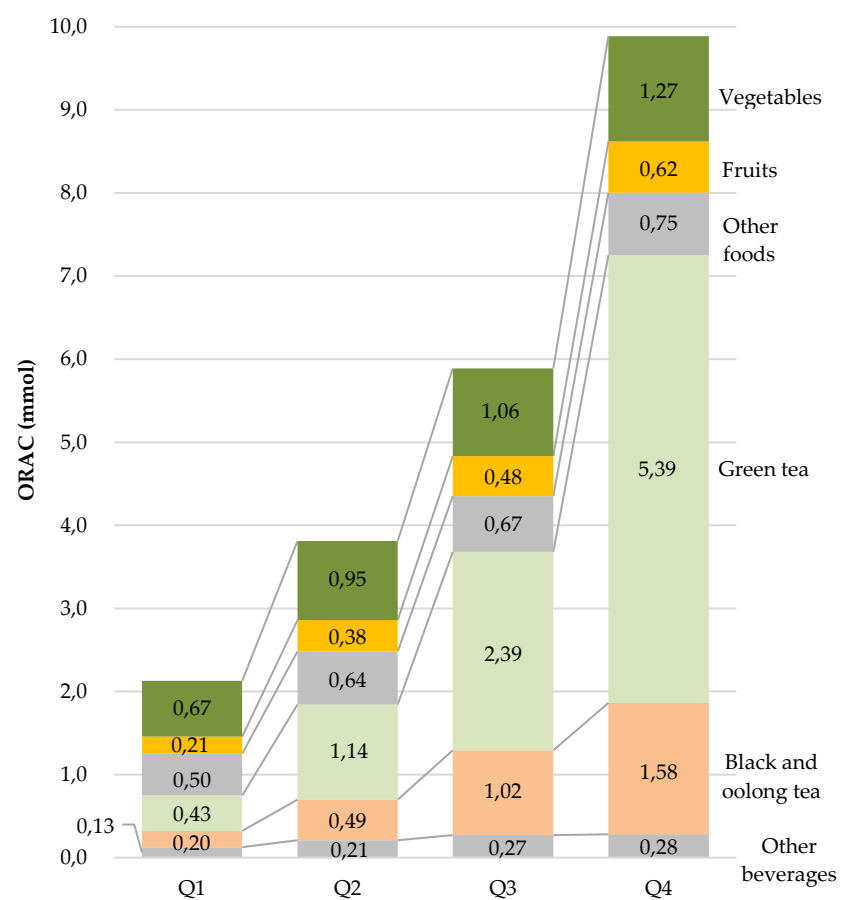

**Supplemental Figure S1.** The main contribution of food items according to quartiles (Q) of dietary non-enzymatic antioxidant capacity estimated by ferric reducing-antioxidant power (FRAP) and oxygen radical absorbance capacity (ORAC). Other foods; the sum of cereals, potatoes, pulses, confectionary and oil, other beverages; the sum of fruit juice and vegetable juice, and alcoholic beverages.

**Supplemental Table S1.** Geometric means (95% CI) of serum liver enzyme levels according to quartiles (Q) of dietary overall NEAC estimated by ORAC, stratified risk factors of liver injury.

|                             | Q1 (lowest)                   | Q2               | Q3               | Q4 (highest)     | <i>p</i> for Trend <sup>a</sup> |
|-----------------------------|-------------------------------|------------------|------------------|------------------|---------------------------------|
| <b>Age</b>                  |                               |                  |                  |                  |                                 |
| <Median <sup>b</sup>        | 251                           | 229              | 181              | 177              |                                 |
| AST                         | 21.5 (20.9–22.2) <sup>c</sup> | 21.3 (20.6–22.1) | 22.1 (21.3–22.9) | 21.4 (20.6–22.3) | 0.77                            |
| ALT                         | 22.5 (21.3–23.7)              | 22.1 (20.9–23.4) | 22.4 (21.0–23.8) | 21.5 (20.1–22.9) | 0.37                            |
| GGT                         | 24.5 (26.7–30.3)              | 28.5 (26.7–30.4) | 27.3 (25.4–29.4) | 26.1 (24.2–28.2) | 0.08                            |
| ≥Median                     | 197                           | 219              | 269              | 268              |                                 |
| AST                         | 22.7 (21.8–23.6)              | 23.0 (22.2–23.9) | 23.3 (22.6–24.1) | 22.4 (21.6–23.1) | 0.62                            |
| ALT                         | 22.5 (21.2–23.8)              | 23.7 (22.5–25.1) | 23.9 (22.7–25.1) | 23.3 (22.1–24.5) | 0.43                            |
| GGT                         | 34.5 (31.8–37.5)              | 38.8 (35.9–41.9) | 37.0 (34.5–39.7) | 34.9 (32.5–37.5) | 0.80                            |
| <b>Body mass index</b>      |                               |                  |                  |                  |                                 |
| <25.0 kg/m <sup>2</sup> , n | 336                           | 352              | 328              | 329              |                                 |
| AST                         | 21.2 (20.6–21.8)              | 21.4 (20.8–22.0) | 22.1 (21.5–22.7) | 22.3 (20.7–21.9) | 0.51                            |
| ALT                         | 20.2 (19.3–21.1)              | 20.5 (19.6–21.4) | 20.8 (19.8–21.7) | 20.8 (19.9–21.8) | 0.32                            |
| GGT                         | 28.5 (26.9–30.3)              | 29.6 (28.0–31.4) | 29.2 (27.5–30.9) | 28.1 (26.5–29.9) | 0.68                            |
| ≥25.0 kg/m <sup>2</sup> , n | 112                           | 96               | 122              | 116              |                                 |
| AST                         | 25.1 (23.7–26.6)              | 25.3 (23.9–26.9) | 24.6 (23.3–26.0) | 23.8 (22.5–25.2) | 0.16                            |
| ALT                         | 30.8 (28.0–33.8)              | 32.2 (30.1–36.6) | 31.6 (29.0–34.5) | 29.3 (26.8–32.0) | 0.36                            |
| GGT                         | 42.9 (38.2–48.2)              | 52.2 (46.2–58.9) | 42.0 (37.7–46.8) | 39.6 (35.4–44.3) | 0.10                            |
| <b>Smoking</b>              |                               |                  |                  |                  |                                 |
| Non-smoker, n               | 282                           | 307              | 339              | 337              |                                 |
| AST                         | 22.2 (21.5–22.9)              | 22.1 (21.5–22.8) | 22.9 (22.3–23.6) | 22.0 (21.3–22.6) | 0.97                            |
| ALT                         | 22.2 (21.1–23.3)              | 22.1 (21.1–23.2) | 22.8 (21.8–23.8) | 21.9 (20.9–22.9) | 0.92                            |
| GGT                         | 31.5 (29.5–33.7)              | 31.4 (29.5–33.7) | 31.0 (29.2–33.0) | 28.3 (26.6–30.1) | 0.07                            |
| Smoker, n                   | 166                           | 141              | 111              | 108              |                                 |
| AST                         | 22.2 (21.4–23.2)              | 22.2 (21.3–23.2) | 22.4 (21.3–23.5) | 21.7 (20.6–22.8) | 0.56                            |
| ALT                         | 23.6 (22.0–25.8)              | 24.6 (22.9–26.4) | 24.5 (22.6–26.6) | 24.1 (22.1–26.2) | 0.68                            |
| GGT                         | 33.5 (30.8–36.4)              | 38.9 (35.6–42.5) | 35.2 (31.8–38.8) | 36.8 (33.2–40.7) | 0.34                            |
| <b>Alcohol drinking</b>     |                               |                  |                  |                  |                                 |
| <23 g of ethanol/day, n     | 295                           | 327              | 336              | 337              |                                 |
| AST                         | 21.6 (20.9–22.2)              | 21.5 (20.9–22.2) | 22.0 (21.4–22.7) | 21.2 (20.6–21.9) | 0.72                            |
| ALT                         | 22.3 (21.2–23.4)              | 22.5 (21.5–23.5) | 22.8 (21.8–23.9) | 22.3 (21.2–23.3) | 0.94                            |
| GGT                         | 27.8 (26.1–29.5)              | 29.5 (27.9–31.3) | 27.8 (26.2–29.4) | 26.2 (24.7–27.7) | 0.07                            |
| ≥23 g of ethanol /day, n    | 153                           | 121              | 114              | 108              |                                 |
| AST                         | 24.1 (23.0–25.2)              | 24.2 (23.0–25.5) | 24.5 (23.2–25.8) | 23.5 (22.2–24.8) | 0.65                            |
| ALT                         | 23.3 (21.8–24.9)              | 23.9 (22.2–25.7) | 24.2 (22.4–26.2) | 23.4 (21.6–25.4) | 0.80                            |
| GGT                         | 46.0 (41.6–51.0)              | 47.8 (42.7–53.5) | 46.5 (41.4–52.3) | 44.6 (39.4–50.5) | 0.71                            |
| <b>Ferritin</b>             |                               |                  |                  |                  |                                 |
| <Median <sup>d</sup> , n    | 248                           | 224              | 209              | 219              |                                 |
| AST                         | 21.2 (20.5–21.8) <sup>d</sup> | 20.6 (20.0–21.3) | 21.6 (20.9–22.3) | 20.6 (20.0–21.3) | 0.98                            |
| ALT                         | 21.1 (20.1–22.2)              | 21.0 (19.1–21.1) | 21.0 (19.9–22.1) | 20.2 (19.1–21.3) | 0.33                            |
| GGT                         | 28.4 (26.6–30.3)              | 27.7 (25.9–29.6) | 28.1 (26.2–30.2) | 26.7 (24.9–28.6) | 0.08                            |
| ≥Median, n                  | 200                           | 224              | 241              | 226              |                                 |
| AST                         | 23.2 (22.3–24.2)              | 24.0 (23.1–24.9) | 24.9 (23.0–24.9) | 23.9 (23.0–24.8) | 0.67                            |
| ALT                         | 23.9 (22.4–25.5)              | 26.2 (24.6–27.8) | 25.5 (24.1–27.1) | 25.3 (23.8–27.0) | 0.30                            |
| GGT                         | 35.3 (32.5–38.4)              | 40.8 (37.7–44.2) | 36.5 (33.8–39.4) | 35.2 (32.5–38.2) | 0.98                            |

NEAC, non-enzymatic antioxidant capacity; FRAP, ferric reducing-antioxidant power. Q, quartile of NEAC; Q1, <25th percentile; Q2, ≥25th percentile and <50th percentile; Q3, ≥50th percentile and <75th percentile; Q4, ≥75th percentile. <sup>a</sup> Trend tests were performed by including the ordinal numbers 1 to 3 assigned to the each quartile category of dietary NEAC in a multiple linear regression analysis. <sup>b</sup> The median age was 42 years old. <sup>c</sup> Adjusted for age (y, continuous), sex, workplace (site A or B), body mass index (kg/m<sup>2</sup>, continuous), occupational physical activity (<3, 3 to <7, 7 to <20, or ≥20 METs-hour/day), leisure-time physical activity (0, >0 to <3, 3 to <10, or ≥10 METs-hour/week), smoking status (never smoker, former smoker, current smoker of <20 cigarettes/day, or current smoker of ≥20 cigarettes/day), alcohol drinking (infrequent drinker consuming alcohol

less than once per week, drinker consuming <23 g of ethanol/day, drinker consuming ≥23 to <46 g of ethanol/day, or drinker consuming ≥46 g of ethanol/day), dyslipidemia (yes or no), use of non-steroidal anti-inflammatory drugs (yes or no), log-transformed serum ferritin (μg/L, continuous), use of supplements (vitamin C, vitamin E, or multivitamins; yes or no), coffee intake (<1, 1 or ≥2 cups/day), and total energy intake (kcal/day, continuous), except for the stratified variable. <sup>d</sup>Median serum ferritin level was 155 μg/L for men and 23 μg/L for women. There were no evidence of an interaction between overall dietary NEAC estimated by ORAC and any confounding factors on serum liver enzymes ( $p > 0.05$ ).

**Supplemental Table S2.** Geometric means (95% CI) of serum liver enzyme levels according to quartiles (Q) of dietary NEAC from foods estimated by FRAP, stratified risk factors of liver injury.

|                             | Q1 (lowest)                   | Q2               | Q3               | Q4 (highest)     | <i>p</i> for Trend <sup>a</sup> |
|-----------------------------|-------------------------------|------------------|------------------|------------------|---------------------------------|
| Age                         |                               |                  |                  |                  |                                 |
| <Median <sup>b</sup> , n    | 240                           | 239              | 194              | 165              |                                 |
| AST                         | 21.2 (20.5–21.9) <sup>c</sup> | 21.6 (20.9–22.3) | 21.5 (20.7–22.3) | 22.3 (21.4–23.2) | 0.12                            |
| ALT                         | 21.9 (20.7–23.1)              | 22.2 (21.0–23.5) | 22.3 (21.0–23.7) | 22.4 (20.9–23.9) | 0.62                            |
| GGT                         | 28.4 (26.5–30.3)              | 28.2 (26.4–30.1) | 26.6 (24.8–28.7) | 27.4 (25.3–29.6) | 0.32                            |
| ≥Median, n                  | 206                           | 215              | 249              | 283              |                                 |
| AST                         | 22.9 (22.0–23.8)              | 23.3 (22.4–24.2) | 23.0 (22.2–23.8) | 22.4 (21.7–23.2) | 0.33                            |
| ALT                         | 24.2 (22.8–25.6)              | 23.3 (22.0–24.6) | 24.1 (22.9–25.4) | 22.3 (21.2–23.4) | 0.08                            |
| GGT                         | 39.5 (36.3–42.8)              | 36.4 (33.6–39.3) | 38.7 (36.0–41.7) | 32.2 (30.0–34.5) | 0.001*                          |
| Body mass index             |                               |                  |                  |                  |                                 |
| <25.0 kg/m <sup>2</sup> , n | 320                           | 347              | 339              | 339              |                                 |
| AST                         | 21.4 (20.8–22.1)              | 21.6 (21.1–22.2) | 21.5 (20.9–22.1) | 21.4 (20.8–22.0) | 0.85                            |
| ALT                         | 20.8 (19.8–21.8)              | 20.5 (19.6–21.4) | 21.1 (20.2–22.0) | 20.0 (19.1–20.9) | 0.42                            |
| GGT                         | 30.8 (29.0–32.8)              | 29.2 (27.6–30.9) | 29.2 (27.6–31.0) | 26.5 (25.0–28.1) | 0.002                           |
| ≥25.0 kg/m <sup>2</sup> , n | 126                           | 107              | 104              | 109              |                                 |
| AST                         | 24.4 (23.1–25.8)              | 25.5 (24.1–27.1) | 24.7 (23.3–26.2) | 24.1 (22.7–25.5) | 0.60                            |
| ALT                         | 31.2 (28.5–34.1)              | 32.5 (29.7–35.7) | 31.7 (28.8–34.8) | 29.2 (26.6–32.0) | 0.29                            |
| GGT                         | 44.8 (40.0–50.1)              | 45.7 (40.6–51.4) | 45.4 (40.3–51.1) | 38.8 (34.5–43.7) | 0.11                            |
| Smoking                     |                               |                  |                  |                  |                                 |
| Non-smoker, n               | 257                           | 317              | 329              | 362              |                                 |
| AST                         | 22.2 (21.5–23.0)              | 22.5 (21.8–23.2) | 22.2 (21.6–22.9) | 22.2 (21.6–22.9) | 0.86                            |
| ALT                         | 22.4 (21.3–23.6)              | 22.6 (21.6–23.7) | 22.5 (21.5–23.5) | 21.6 (20.7–22.6) | 0.26                            |
| GGT                         | 32.4 (30.2–34.8)              | 31.7 (29.8–33.7) | 30.6 (28.8–32.6) | 28.1 (26.5–29.8) | 0.001                           |
| Smoker, n                   | 189                           | 137              | 114              | 86               |                                 |
| AST                         | 22.0 (21.2–22.9)              | 22.2 (21.2–23.2) | 22.6 (21.5–23.7) | 21.8 (20.6–23.0) | 0.99                            |
| ALT                         | 24.4 (22.9–26.0)              | 22.9 (21.3–24.6) | 25.8 (23.8–28.0) | 23.5 (21.4–25.8) | 0.91                            |
| GGT                         | 37.8 (34.9–40.8)              | 34.0 (31.1–37.2) | 38.1 (34.5–42.1) | 32.4 (28.9–36.4) | 0.15                            |
| Alcohol drinking            |                               |                  |                  |                  |                                 |
| <23 g of ethanol/day, n     | 277                           | 319              | 344              | 355              |                                 |
| AST                         | 21.5 (20.8–22.2)              | 21.8 (21.2–22.4) | 21.7 (21.1–22.3) | 21.4 (20.8–22.0) | 0.85                            |
| ALT                         | 22.7 (21.6–23.9)              | 22.6 (21.6–23.7) | 22.8 (21.8–23.9) | 21.8 (20.9–22.8) | 0.30                            |
| GGT                         | 30.3 (28.4–32.3)              | 28.8 (27.1–30.5) | 27.6 (26.1–29.2) | 25.3 (23.9–26.7) | <0.001                          |
| ≥23 g of ethanol /day, n    | 169                           | 135              | 99               | 93               |                                 |
| AST                         | 24.2 (23.1–25.3)              | 24.3 (23.1–25.5) | 23.8 (22.5–25.5) | 23.9 (22.5–25.3) | 0.61                            |
| ALT                         | 23.8 (22.3–25.5)              | 23.3 (21.7–25.0) | 24.5 (22.5–26.6) | 23.1 (21.2–25.3) | 0.86                            |
| GGT                         | 47.1 (42.7–52.0)              | 44.7 (40.2–49.7) | 49.3 (43.5–55.9) | 43.9 (38.5–50.1) | 0.74                            |
| Ferritin                    |                               |                  |                  |                  |                                 |
| <Median <sup>d</sup> , n    | 250                           | 214              | 225              | 211              |                                 |
| AST                         | 20.8 (20.1–21.4) <sup>d</sup> | 21.0 (20.3–21.7) | 20.9 (20.3–21.7) | 21.4 (20.7–22.1) | 0.26                            |
| ALT                         | 23.6 (22.6–24.6)              | 24.0 (23.1–24.9) | 23.7 (22.7–24.6) | 23.1 (22.2–24.0) | 0.96                            |
| GGT                         | 20.7 (19.7–21.8)              | 20.2 (19.2–21.3) | 20.8 (19.8–21.9) | 20.6 (19.5–21.7) | 0.16                            |
| ≥Median, n                  | 196                           | 240              | 218              | 237              |                                 |
| AST                         | 25.3 (23.7–27.1)              | 25.7 (24.2–27.2) | 26.0 (24.4–27.6) | 24.2 (22.8–25.7) | 0.35                            |
| ALT                         | 29.0 (27.1–30.9)              | 27.6 (25.7–29.5) | 27.2 (25.5–29.1) | 27.0 (25.2–29.0) | 0.36                            |
| GGT                         | 39.6 (36.3–43.2)              | 37.7 (35.0–40.7) | 38.6 (35.7–41.8) | 32.7 (30.3–35.4) | 0.004*                          |

NEAC, non-enzymatic antioxidant capacity; FRAP, ferric reducing-antioxidant power. Q, quartile of NEAC; Q1, <25th percentile; Q2, ≥25th percentile and <50th percentile; Q3, ≥50th percentile and <75th percentile; Q4, ≥75th percentile. <sup>a</sup> Trend tests were performed by including the ordinal numbers 1 to 3 assigned to the each quartile category of dietary NEAC in a multiple linear regression analysis. <sup>b</sup> The median age was 42 years old. <sup>c</sup> Adjusted for age (y, continuous), sex, workplace (site A or B), body mass index (kg/m<sup>2</sup>, continuous), occupational physical activity (<3, 3 to <7, 7 to <20, or ≥20 METs-hour/day), leisure-time physical activity (0, >0 to <3, 3 to <10, or ≥10 METs-hour/week), smoking status (never smoker, former smoker, current smoker of <20 cigarettes/day, or current smoker of ≥20 cigarettes/day), alcohol drinking (infrequent drinker consuming alcohol less than once per week, drinker consuming <23 g of ethanol/day, drinker consuming ≥23 to <46 g of ethanol/day, or drinker consuming ≥46 g of ethanol/day), dyslipidemia (yes or no), use of non-steroidal anti-inflammatory drugs (yes or no), log-transformed serum ferritin (μg/L, continuous), use of supplements (vitamin C, vitamin E, or multivitamins; yes or no), coffee intake (<1, 1 or ≥2 cups/day), and total energy intake (kcal/day, continuous), except for the stratified variable. <sup>d</sup> Median serum ferritin level is 155 μg/L for men and 23 μg/L for

women. \* Significantly interaction between dietary NEAC from foods estimated by FRAP and age group (<median or  $\geq$ median) or serum ferritin level (<median or  $\geq$ median) on serum GGT: \*  $p < 0.05$ . There were no evidence of an interaction between dietary NEAC from foods estimated by FRAP and other confounding factors on serum liver enzymes ( $p > 0.05$ ).

**Supplemental Table S3.** Geometric means (95% CI) of serum liver enzyme levels according to quartiles (Q) of dietary NEAC from foods estimated by ORAC, stratified risk factors of liver injury.

|                             | Q1 (lowest)                   | Q2               | Q3               | Q4 (highest)     | <i>p</i> for Trend <sup>a</sup> |
|-----------------------------|-------------------------------|------------------|------------------|------------------|---------------------------------|
| Age                         |                               |                  |                  |                  |                                 |
| <Median <sup>b</sup>        | 243                           | 232              | 196              | 167              |                                 |
| AST                         | 21.3 (20.6–22.0) <sup>c</sup> | 21.5 (20.8–22.3) | 21.6 (20.8–22.4) | 22.0 (21.2–22.9) | 0.22                            |
| ALT                         | 21.8 (20.6–23.1)              | 22.7 (21.4–24.0) | 21.8 (20.5–23.2) | 22.3 (20.9–23.9) | 0.85                            |
| GGT                         | 28.1 (26.3–30.1)              | 28.3 (26.5–30.3) | 26.5 (24.7–28.5) | 27.7 (25.6–30.0) | 0.46                            |
| ≥Median                     | 203                           | 211              | 256              | 283              |                                 |
| AST                         | 22.7 (21.8–23.6)              | 23.3 (22.5–24.2) | 23.5 (22.7–24.3) | 22.1 (21.4–22.9) | 0.28                            |
| ALT                         | 23.7 (22.3–25.1)              | 23.8 (22.5–25.2) | 24.5 (23.3–25.8) | 21.9 (20.9–23.1) | 0.07                            |
| GGT                         | 36.9 (34.0–40.1)              | 37.9 (35.0–41.1) | 39.2 (36.4–42.1) | 32.3 (30.1–34.6) | 0.02                            |
| Body mass index             |                               |                  |                  |                  |                                 |
| <25.0 kg/m <sup>2</sup> , n | 318                           | 332              | 353              | 342              |                                 |
| AST                         | 21.5 (20.9–22.2)              | 21.6 (21.0–22.2) | 21.8 (21.2–22.4) | 21.1 (20.5–21.7) | 0.46                            |
| ALT                         | 20.7 (20.0–32.8)              | 29.2 (27.6–30.9) | 29.2 (27.6–31.0) | 26.5 (25.0–28.1) | 0.22                            |
| GGT                         | 30.4 (28.5–32.3)              | 29.3 (27.7–31.1) | 29.6 (28.0–31.3) | 26.4 (24.9–28.0) | 0.004                           |
| ≥25.0 kg/m <sup>2</sup> , n | 128                           | 111              | 99               | 108              |                                 |
| AST                         | 24.0 (22.7–25.3)              | 25.5 (24.1–27.0) | 25.5 (24.1–27.0) | 25.5 (24.0–27.0) | 0.95                            |
| ALT                         | 30.8 (28.2–33.6)              | 32.4 (29.6–35.4) | 32.2 (29.2–35.4) | 29.4 (26.7–32.3) | 0.52                            |
| GGT                         | 41.6 (37.2–46.5)              | 47.4 (42.2–53.1) | 45.7 (40.5–51.7) | 40.5 (35.9–45.6) | 0.72                            |
| Smoking                     |                               |                  |                  |                  |                                 |
| Non-smoker, n               | 256                           | 304              | 348              | 357              |                                 |
| AST                         | 22.1 (21.4–22.9)              | 22.5 (21.8–23.2) | 22.7 (22.1–23.3) | 21.9 (21.3–22.5) | 0.61                            |
| ALT                         | 22.2 (21.0–23.3)              | 22.8 (21.8–23.9) | 22.8 (21.8–23.8) | 21.3 (20.4–22.3) | 0.24                            |
| GGT                         | 31.4 (29.2–33.6)              | 31.8 (29.9–33.9) | 31.3 (29.5–33.2) | 28.1 (26.5–29.8) | 0.01                            |
| Smoker, n                   | 190                           | 139              | 104              | 93               |                                 |
| AST                         | 21.9 (21.1–22.8)              | 22.3 (21.4–23.3) | 22.5 (21.4–23.7) | 21.9 (20.8–23.1) | 0.80                            |
| ALT                         | 24.0 (22.5–25.6)              | 24.0 (22.3–25.8) | 25.0 (22.9–27.2) | 23.7 (21.7–26.0) | 0.92                            |
| GGT                         | 36.3 (33.6–39.3)              | 35.8 (32.8–39.1) | 37.7 (34.0–41.8) | 33.3 (29.8–37.3) | 0.44                            |
| Alcohol drinking            |                               |                  |                  |                  |                                 |
| <23 g of ethanol/day, n     | 280                           | 316              | 339              | 360              |                                 |
| AST                         | 21.6 (20.9–22.3)              | 21.5 (20.9–22.2) | 22.1 (21.5–22.7) | 21.2 (20.6–21.8) | 0.56                            |
| ALT                         | 22.6 (21.5–23.8)              | 22.7 (21.6–23.8) | 23.2 (22.2–24.3) | 21.6 (20.6–22.6) | 0.25                            |
| GGT                         | 28.9 (27.2–30.8)              | 29.2 (27.6–31.0) | 27.9 (26.4–29.5) | 25.6 (24.2–27.1) | 0.002                           |
| ≥23 g of ethanol /day, n    | 166                           | 127              | 133              | 90               |                                 |
| AST                         | 23.8 (22.7–24.9)              | 24.8 (23.6–26.0) | 24.1 (22.9–25.5) | 23.5 (22.1–25.0) | 0.72                            |
| ALT                         | 23.6 (22.0–25.2)              | 24.3 (22.6–26.2) | 23.7 (22.0–25.7) | 22.9 (21.0–25.0) | 0.62                            |
| GGT                         | 46.3 (41.8–51.2)              | 45.1 (40.4–50.3) | 49.8 (44.3–56.0) | 43.6 (38.2–49.9) | 0.89                            |
| Ferritin                    |                               |                  |                  |                  |                                 |
| <Median <sup>d</sup> , n    | 253                           | 206              | 233              | 208              |                                 |
| AST                         | 20.6 (20.0–21.3) <sup>d</sup> | 21.2 (20.5–21.9) | 21.1 (20.5–21.8) | 21.1 (20.4–21.8) | 0.35                            |
| ALT                         | 20.3 (19.3–21.3)              | 20.7 (19.7–21.8) | 21.1 (20.1–22.2) | 20.3 (19.2–21.4) | 0.84                            |
| GGT                         | 28.5 (26.7–30.5)              | 28.2 (26.3–30.2) | 27.5 (25.8–29.4) | 26.6 (24.8–28.6) | 0.16                            |
| ≥Median, n                  | 193                           | 237              | 219              | 242              |                                 |
| AST                         | 23.8 (22.8–24.8)              | 23.7 (22.8–24.6) | 24.3 (23.4–25.3) | 22.7 (21.9–23.6) | 0.21                            |
| ALT                         | 25.9 (24.4–27.4)              | 26.0 (24.4–27.6) | 23.9 (22.5–27.6) | 23.9 (22.5–25.4) | 0.17                            |
| GGT                         | 37.6 (34.4–41.0)              | 38.1 (35.3–41.2) | 39.1 (36.1–42.4) | 33.5 (31.0–36.3) | 0.07                            |

NEAC, non-enzymatic antioxidant capacity; ORAC, oxygen radical absorbance capacity. Q, quartile of NEAC; Q1, <25th percentile; Q2, ≥25th percentile and <50th percentile; Q3, ≥50th percentile and <75th percentile; Q4, ≥75th percentile. <sup>a</sup> Trend tests were performed by including the ordinal numbers 1 to 3 assigned to the each quartile category of dietary NEAC in a multiple linear regression analysis. <sup>b</sup> The median age is 42 years old. <sup>c</sup> Adjusted for age (y, continuous), sex, workplace (site A or B), body mass index (kg/m<sup>2</sup>, continuous), occupational physical activity (<3, 3 to <7, 7 to <20, or ≥20 METs-hour/day), leisure-time physical activity (0, >0 to <3, 3 to <10, or ≥10 METs-hour/week), smoking status (never smoker, former smoker, current smoker of <20 cigarettes/day, or current smoker of ≥20 cigarettes/day), alcohol drinking (infrequent drinker consuming alcohol less than once per week, drinker consuming <23 g of ethanol/day, drinker consuming ≥23 to <46 g of ethanol/day, or drinker consuming ≥46 g of ethanol/day), dyslipidemia (yes or no), use of non-steroidal anti-inflammatory drugs (yes or no), log-transformed serum ferritin (μg/L, continuous), use of supplements (vitamin C, vitamin E, or multivitamins; yes or no), coffee intake (<1, 1 or ≥2 cups/day), and total energy intake (kcal/day, continuous), except for the stratified variable. <sup>d</sup> Median serum ferritin level is 155 μg/L for men and 23 μg/L for

women. There were no evidence of an interaction between dietary NEAC from foods estimated by ORAC and any confounding factors on serum liver enzymes ( $p > 0.05$ ).
